# Supplementary material for: Petrogenesis and tectonic setting of late Paleoproterozoic diorites in the Trans-North China Orogen
Source: Copernicus journal article supplement (doi:10.5194/se-17-203-2026), 2026-02-04
Supplement: Supplementary file 1 [file TableS1-WangZY2025-ZirconAge.xlsx]

## Sheet: Table S1
Table S1 Zircon U–Pb isotopic data for the Jiguanshan diorite obtained by the LA-ICP-MS technique
Spot No.	Element content (ppm)		Th/U	Isotopic ratio						Age (Ma)						Concordance
	Th	U		207Pb/206Pb	±1SE	207Pb/235U	±1SE	206Pb/238U	±1SE	207Pb/206Pb	±1SE	207Pb/235U	±1SE	206Pb/238U	±1SE
Sample ZY2202
ZY2202-2	744.83	389.257	1.91347	0.113769	0.00246935	4.65573	0.104973	0.294336	0.00352893	1861.12	39.1975	1759.32	18.8839	1663.16	17.5987	0.94
ZY2202-3	1888.34	784.432	2.40727	0.114309	0.00250174	5.16991	0.112218	0.324739	0.00326226	1868.83	40.28	1847.68	18.5104	1812.83	15.9049	0.98
ZY2202-4	2207.88	1354.62	1.62989	0.108105	0.00274362	3.74256	0.0941882	0.248696	0.00306398	1768.52	46.295	1580.52	20.1944	1431.75	15.8367	0.9
ZY2202-5	1440.44	525.483	2.74117	0.114547	0.00282456	5.1755	0.122644	0.324938	0.00353847	1872.53	44.4425	1848.6	20.2044	1813.8	17.2441	0.98
ZY2202-8	483.915	516.971	0.936059	0.115303	0.00281091	5.22052	0.132431	0.325674	0.00390938	1884.88	44.1375	1855.97	21.6538	1817.38	19.0356	0.97
ZY2202-9	4027.56	1603.92	2.51108	0.108939	0.00265437	4.07506	0.1032	0.268782	0.00292519	1783.34	44.445	1649.33	20.6779	1534.62	14.8853	0.92
ZY2202-10	2090.88	1218.17	1.71641	0.108903	0.00242061	3.79924	0.0917416	0.250873	0.00325371	1781.17	40.7425	1592.59	19.4401	1442.97	16.7862	0.9
ZY2202-11	1953.54	875.906	2.23031	0.109669	0.00249195	5.00047	0.114589	0.327661	0.00321721	1794.44	40.745	1819.4	19.4299	1827.03	15.6522	0.99
ZY2202-12	1032.21	501.795	2.05704	0.10695	0.00285685	4.63538	0.122621	0.311662	0.00343796	1747.83	48.765	1755.66	22.126	1748.88	16.9229	0.99
ZY2202-13	2698.02	636.197	4.24086	0.10694	0.00285297	4.78741	0.12554	0.320941	0.00342471	1747.83	48.765	1782.69	22.0588	1794.32	16.7412	0.99
ZY2202-14	2708.47	442.743	6.11746	0.108056	0.00264083	4.49138	0.108512	0.297692	0.00342104	1768.52	44.7525	1729.38	20.0988	1679.85	17.0185	0.97
ZY2202-15	877.057	503.745	1.74107	0.107707	0.00266268	5.17259	0.122808	0.34365	0.00420984	1760.8	44.2925	1848.12	20.2408	1904.21	20.2237	0.97
ZY2202-17	4087.11	800.922	5.10301	0.114929	0.00326592	4.70971	0.125244	0.292065	0.00364732	1879.63	50.7775	1768.97	22.3051	1651.84	18.2191	0.93
ZY2202-18	4083.55	2294.12	1.78	0.101475	0.00241867	3.34447	0.0834391	0.234884	0.00342692	1651.54	44.135	1491.5	19.5276	1360.04	17.9045	0.9
ZY2202-20	570.249	559.499	1.01921	0.107505	0.00281728	4.74397	0.117525	0.315999	0.00347438	1757.71	48.1475	1775.04	20.8103	1770.16	17.046	0.99
ZY2202-21	4372.32	2538.4	1.72247	0.100987	0.00228585	3.58147	0.0776351	0.253673	0.00241165	1642.59	41.9775	1545.43	17.2382	1457.39	12.4257	0.94
ZY2202-22	2099.13	1658.15	1.26595	0.10505	0.00243755	4.02074	0.088414	0.274103	0.00288203	1716.66	42.44	1638.4	17.9153	1561.59	14.6062	0.95
ZY2202-23	775.711	637.473	1.21685	0.106809	0.00271105	4.91154	0.116917	0.329109	0.00346575	1746.29	46.6025	1804.24	20.1194	1834.06	16.8387	0.98
ZY2202-24	946.762	479.553	1.97426	0.106892	0.00308704	4.74661	0.128076	0.317621	0.00357896	1747.21	52.315	1775.51	22.6622	1778.1	17.5362	0.99
ZY2202-25	481.29	337.015	1.4281	0.108312	0.00306164	4.96538	0.132027	0.328918	0.00394269	1772.22	50.77	1813.45	22.5065	1833.14	19.1511	0.98
ZY2202-26	1353.09	839.594	1.6116	0.11124	0.00273134	4.7512	0.114352	0.30624	0.00327825	1820.37	44.445	1776.32	20.2252	1722.18	16.2052	0.96
ZY2202-27	4395.86	1603.95	2.74064	0.111534	0.00283872	4.01388	0.10098	0.258396	0.00259378	1824.38	46.295	1637.01	20.4802	1481.63	13.3113	0.9
ZY2202-28	1608.32	1385.98	1.16042	0.113847	0.00402421	4.45526	0.172939	0.280097	0.00400729	1861.42	63.1175	1722.68	32.2102	1591.85	20.1985	0.92
ZY2202-32	8553.54	2095.39	4.08208	0.10412	0.00259711	3.73929	0.0970866	0.258915	0.00293406	1699.08	45.215	1579.82	20.8283	1484.29	15.0455	0.93
ZY2202-34	309.018	261.777	1.18047	0.106839	0.00258802	4.80084	0.117679	0.324193	0.00346607	1745.98	44.445	1785.05	20.6343	1810.17	16.9018	0.98
ZY2202-35	880.873	372.574	2.36429	0.108156	0.00258453	4.93526	0.119075	0.328981	0.00378194	1768.83	44.29	1808.31	20.4079	1833.44	18.3715	0.98
ZY2202-36	2245.32	1116.38	2.01126	0.102172	0.00266128	4.14472	0.108023	0.291871	0.00347927	1664.81	52.7775	1663.17	21.3498	1650.87	17.3844	0.99
ZY2202-38	1408.77	678.465	2.07641	0.106223	0.00229934	4.57132	0.100119	0.308964	0.00311917	1735.49	40.28	1744.05	18.2854	1735.61	15.3899	0.99
ZY2202-40	868.247	733.234	1.18413	0.108225	0.00213968	5.11073	0.104102	0.339348	0.00353118	1769.44	36.115	1837.89	17.343	1883.53	17.0263	0.97
Sample ZY2204
ZY2204-1	528.627	1763.07	0.299834	0.105717	0.0020381	4.29947	0.085596	0.291348	0.00304104	1727.78	35.4925	1693.26	16.4406	1648.26	15.2069	0.97
ZY2204-2	310.116	575.857	0.53853	0.108563	0.00256654	4.88406	0.119897	0.322414	0.00376652	1775.93	43.21	1799.51	20.7262	1801.51	18.3865	0.99
ZY2204-3	2123.05	900.97	2.3564	0.108376	0.00277526	4.81145	0.124391	0.318311	0.00364959	1772.53	46.6075	1786.9	21.7677	1781.48	17.8721	0.99
ZY2204-4	967.948	546.287	1.77187	0.107994	0.00327933	4.68069	0.143387	0.310831	0.00401922	1765.73	55.245	1763.79	25.6575	1744.8	19.7882	0.98
ZY2204-5	225.464	270.899	0.832283	0.106361	0.00315475	4.71868	0.141211	0.31823	0.00384335	1738.88	54.165	1770.56	25.1017	1781.08	18.8194	0.99
ZY2204-6	619.172	490.14	1.26326	0.105555	0.00270455	4.75877	0.12643	0.32327	0.0037702	1723.76	46.915	1777.65	22.3248	1805.68	18.3927	0.98
ZY2204-7	573.489	460.727	1.24475	0.104809	0.00256273	4.74922	0.116756	0.32536	0.00333979	1710.8	45.06	1775.97	20.6559	1815.85	16.2739	0.97
ZY2204-9	1182.86	863.182	1.37035	0.10507	0.00281736	4.76055	0.128901	0.32469	0.00384555	1716.66	49.845	1777.97	22.7528	1812.59	18.7394	0.98
ZY2204-10	2730.68	2054.01	1.32944	0.104412	0.00251542	4.1469	0.0990764	0.284129	0.00323452	1705.56	44.445	1663.6	19.5785	1612.12	16.2608	0.96
ZY2204-11	209.365	804.87	0.260123	0.10696	0.00277047	4.38432	0.115142	0.29245	0.00411685	1749.99	46.45	1709.39	21.7447	1653.76	20.5532	0.96
ZY2204-13	610.497	712.426	0.856926	0.116425	0.00347327	5.36924	0.145544	0.329173	0.00391853	1902.16	53.705	1879.96	23.2378	1834.37	19.0305	0.97
ZY2204-14	234.89	345.526	0.679804	0.112833	0.00301776	5.18433	0.129427	0.328752	0.00358478	1855.56	48.1475	1850.05	21.2873	1832.33	17.4196	0.99
ZY2204-15	2070.36	1023.64	2.02255	0.110832	0.0026243	4.96585	0.115646	0.320575	0.00326127	1813.27	42.905	1813.53	19.7215	1792.54	15.9494	0.98
ZY2204-16	427.054	859.343	0.496954	0.109593	0.00288374	4.16785	0.113521	0.272704	0.00341809	1794.44	47.8425	1667.72	22.3335	1554.51	17.3334	0.92
ZY2204-17	297.355	335.96	0.885091	0.110137	0.00301546	5.08813	0.144653	0.332234	0.0042098	1801.54	50.005	1834.13	24.1576	1849.2	20.3948	0.99
ZY2204-18	1713.49	1112.48	1.54025	0.107596	0.00248318	4.7735	0.110415	0.318797	0.00299096	1758.95	47.2225	1780.25	19.4563	1783.85	14.6518	0.99
ZY2204-19	275.041	283.94	0.968661	0.110421	0.00283542	4.93247	0.124473	0.321536	0.00336072	1806.48	47.38	1807.83	21.3398	1797.22	16.4222	0.99
ZY2204-20	1375.79	313.676	4.38603	0.107265	0.00302944	4.92394	0.13791	0.33027	0.00406925	1753.7	51.8525	1806.37	23.6701	1839.69	19.7444	0.98
ZY2204-21	1310.8	911.889	1.43745	0.103454	0.00251988	3.73251	0.0902829	0.257979	0.00257733	1686.73	44.445	1578.37	19.4003	1479.49	13.2315	0.93
ZY2204-22	218.534	325.726	0.670914	0.105793	0.00302153	4.83361	0.119306	0.315934	0.00324254	1728.09	52.0075	1790.77	20.8018	1769.84	15.9131	0.98
ZY2204-25	1585.17	1285.29	1.23332	0.100551	0.00288169	3.61616	0.102039	0.256929	0.00324563	1635.18	53.55	1553.09	22.4697	1474.11	16.6649	0.94
ZY2204-26	2239.66	1336.63	1.67561	0.112926	0.00293184	4.50839	0.115114	0.286204	0.00305077	1847.22	47.685	1732.52	21.252	1622.53	15.3155	0.93
ZY2204-27	664.681	575.598	1.15477	0.107466	0.00246897	4.73423	0.109959	0.316586	0.00313418	1766.66	41.98	1773.32	19.5083	1773.03	15.3758	0.99
ZY2204-28	238.499	417.484	0.571277	0.106448	0.00273366	4.64497	0.123011	0.31467	0.00354134	1739.19	47.6875	1757.39	22.1587	1763.65	17.3908	0.99
ZY2204-29	647.279	345.901	1.87128	0.108936	0.00301168	5.0347	0.148938	0.333674	0.00445009	1783.34	49.8475	1825.18	25.0906	1856.17	21.5332	0.98
ZY2204-30	1901.73	1341.86	1.41724	0.10055	0.0025434	3.72358	0.0915091	0.262643	0.00257727	1635.18	46.7575	1576.45	19.7	1503.35	13.1833	0.95
ZY2204-31	715.201	511.166	1.39916	0.106463	0.00235577	4.67132	0.106435	0.316518	0.00309153	1739.81	40.74	1762.12	19.0937	1772.7	15.1681	0.99
ZY2204-32	2240.39	1477.16	1.51669	0.102377	0.00203584	4.01341	0.0839839	0.282574	0.00286762	1677.78	37.0375	1636.92	17.0459	1604.32	14.4391	0.97
ZY2204-33	1051.05	501.576	2.0955	0.105038	0.00207146	4.61576	0.0993834	0.316388	0.00355052	1716.66	35.645	1752.12	18.0089	1772.07	17.4134	0.98
ZY2204-34	768.445	822.99	0.933724	0.10493	0.00197395	4.57163	0.0918271	0.313816	0.00356813	1713.27	33.7925	1744.11	16.7767	1759.46	17.5333	0.99
ZY2204-35	2198.37	1187.04	1.85198	0.102691	0.00199237	3.76495	0.0778006	0.263452	0.00281273	1673.14	36.27	1585.31	16.6139	1507.48	14.3742	0.94
ZY2204-36	758.105	399.966	1.89542	0.108682	0.00254092	4.62116	0.113217	0.305057	0.00311537	1777.47	10.185	1753.1	20.4858	1716.34	15.4165	0.97
Sample ZY2205
ZY2205-2	1643.23	1226.64	1.33962	0.108837	0.00227793	4.43752	0.0989265	0.293812	0.00331063	1779.94	37.5	1719.37	18.5102	1660.55	16.5195	0.96
ZY2205-4	333.838	523.443	0.637773	0.108286	0.00285049	4.89988	0.133218	0.326546	0.00393435	1772.22	48.15	1802.24	22.9599	1821.62	19.1445	0.98
ZY2205-5	1332.43	1050.14	1.26881	0.106452	0.0026868	4.44582	0.125427	0.300468	0.00470272	1739.81	46.3	1720.92	23.4154	1693.63	23.3293	0.98
ZY2205-6	4219.64	1509.43	2.79551	0.104773	0.00239417	3.94345	0.0917444	0.269977	0.00293183	1710.18	36.8825	1622.65	18.8766	1540.69	14.9052	0.94
ZY2205-7	1291.1	1196.3	1.07924	0.103753	0.00248442	3.72009	0.0888567	0.256422	0.00301535	1692.28	44.445	1575.7	19.1448	1471.51	15.4915	0.93
ZY2205-10	1559.4	1069.55	1.458	0.100732	0.00245745	3.82252	0.0886251	0.271513	0.00272864	1638.88	45.835	1597.5	18.6916	1548.48	13.8591	0.96
ZY2205-11	470.886	603.83	0.779832	0.105559	0.0025578	4.76361	0.118183	0.323777	0.00388567	1723.76	44.4425	1778.51	20.8555	1808.15	18.9473	0.98
ZY2205-13	667.488	524.059	1.27369	0.10897	0.0029535	4.92844	0.135927	0.325711	0.00362056	1783.34	49.8475	1807.14	23.3131	1817.56	17.6327	0.99
ZY2205-15	3073.89	1259.95	2.4397	0.105128	0.0026237	3.97492	0.10302	0.271341	0.00323692	1716.36	45.9925	1629.09	21.0555	1547.6	16.4343	0.94
ZY2205-16	1203.37	695.992	1.72901	0.108047	0.00312015	4.85103	0.139473	0.321921	0.00373158	1768.52	53.55	1793.79	24.2347	1799.11	18.2231	0.99
ZY2205-17	189.835	300.962	0.630759	0.108764	0.00322708	4.88664	0.143718	0.322052	0.00384203	1788.89	53.86	1799.95	24.82	1799.74	18.7592	0.99
ZY2205-18	954.654	743.752	1.28357	0.110816	0.00278155	4.92583	0.122766	0.318527	0.00324414	1812.65	45.685	1806.69	21.0715	1782.53	15.8901	0.98
ZY2205-19	411.655	393.667	1.04569	0.108984	0.00283815	4.90787	0.126826	0.323179	0.00344023	1783.34	14.66	1803.61	21.832	1805.24	16.7888	0.99
ZY2205-20	1743.33	1663.17	1.0482	0.104877	0.00293237	3.91884	0.108587	0.268061	0.00305875	1722.22	50.7725	1617.58	22.4423	1530.95	15.5717	0.94
ZY2205-22	1930.97	988.267	1.9539	0.106941	0.00288695	4.25984	0.11611	0.285691	0.00342392	1747.83	50	1685.64	22.4437	1619.96	17.1897	0.96
ZY2205-23	817.95	743.893	1.09955	0.114162	0.00331467	5.5281	0.156636	0.347435	0.00391946	1933.34	52.47	1904.98	24.3977	1922.34	18.7802	0.99
ZY2205-25	1180.47	911.35	1.2953	0.109253	0.00337762	5.08861	0.153521	0.334331	0.00385456	1786.73	56.6375	1834.21	25.6327	1859.34	18.6492	0.98
ZY2205-26	824.724	944.948	0.872772	0.108129	0.00286985	4.83277	0.141783	0.320475	0.00500873	1768.52	48.1475	1790.62	24.712	1792.05	24.4712	0.99
ZY2205-27	3817.67	891.767	4.28102	0.106102	0.00263549	3.89716	0.0953182	0.264461	0.00253161	1800	50.77	1613.09	19.7938	1512.62	12.9324	0.93
ZY2205-28	603.128	388.723	1.55156	0.108502	0.00293357	4.89913	0.133094	0.325349	0.00340781	1775.93	54.4775	1802.11	22.9415	1815.8	16.6044	0.99
ZY2205-29	1431.07	477.273	2.99843	0.109703	0.00292122	4.78778	0.1285	0.31477	0.00325561	1794.75	48.1525	1782.76	22.576	1764.14	15.9909	0.98
ZY2205-30	519.449	611.041	0.850105	0.107233	0.00255145	4.55937	0.110866	0.306412	0.00298997	1753.7	43.365	1741.87	20.2836	1723.02	14.7832	0.98
ZY2205-31	2152.46	746.958	2.88163	0.105955	0.00258765	4.65037	0.121961	0.316664	0.00391184	1731.48	44.445	1758.36	21.9493	1773.42	19.1764	0.99
ZY2205-32	266.642	349.013	0.763989	0.108168	0.00304511	4.93432	0.146798	0.328298	0.00398861	1768.83	51.8525	1808.15	25.1478	1830.13	19.3825	0.98
ZY2205-33	575.277	621.582	0.925504	0.112033	0.00328796	5.08255	0.147761	0.327664	0.00387192	1832.41	47.995	1833.2	24.6978	1827.05	18.8258	0.99
ZY2205-35	671.576	755.188	0.889284	0.108547	0.00230079	4.71475	0.0993834	0.312131	0.00289584	1775.93	38.5825	1769.86	17.6992	1751.18	14.2585	0.98
ZY2205-36	1940.74	1206.03	1.60919	0.106653	0.00235775	4.43406	0.0962048	0.298085	0.00252417	1742.9	40.5875	1718.73	18.0143	1681.81	12.5681	0.97
Sample ZY2207
ZY2207-1	1246.49	983.245	1.26773	0.10763	0.00223165	4.22234	0.0912926	0.281647	0.00298661	1761.11	38.4275	1678.37	17.7867	1599.65	15.0468	0.95
ZY2207-2	1063.6	1020.47	1.04226	0.1082	0.00250921	4.42519	0.103293	0.293685	0.00303189	1769.44	41.5125	1717.07	19.3675	1659.92	15.1344	0.96
ZY2207-3	813.338	683.893	1.18928	0.109744	0.00285604	4.87889	0.128174	0.3191	0.00376445	1795.37	47.69	1798.62	22.1715	1785.33	18.422	0.99
ZY2207-4	113.161	180.672	0.626334	0.110035	0.00358468	5.05891	0.164393	0.330493	0.00455268	1799.69	59.5725	1829.24	27.5778	1840.77	22.0807	0.99
ZY2207-5	487.754	690.683	0.706191	0.107412	0.00314726	4.90076	0.141065	0.326968	0.00391517	1766.66	53.705	1802.39	24.3049	1823.67	19.0454	0.98
ZY2207-6	261.423	225.025	1.16175	0.108739	0.00297703	5.12401	0.138335	0.337018	0.00374722	1788.89	50	1840.09	22.9705	1872.31	18.0954	0.98
ZY2207-7	109.553	305.164	0.358996	0.106995	0.00287454	4.88942	0.12172	0.327284	0.00353358	1749.99	49.5375	1800.43	21.0213	1825.2	17.1903	0.98
ZY2207-8	956.785	602.635	1.58767	0.107766	0.00317437	4.77841	0.129315	0.316646	0.00351463	1762.04	54.7825	1781.11	22.7554	1773.33	17.2345	0.99
ZY2207-9	1202.92	762.056	1.57852	0.108933	0.00321879	4.88664	0.133804	0.320583	0.00376229	1783.34	53.7075	1799.95	23.1123	1792.57	18.3911	0.99
ZY2207-10	598.827	631.285	0.948584	0.108109	0.00280403	4.91473	0.119982	0.325323	0.00323259	1768.52	47.065	1804.79	20.6338	1815.67	15.754	0.99
ZY2207-12	1500.01	1247.79	1.20214	0.10358	0.00313935	4.17557	0.124922	0.289208	0.00297946	1700	55.8625	1669.24	24.5345	1637.57	14.9244	0.98
ZY2207-13	2112.68	1080	1.95618	0.104618	0.00317111	4.21695	0.129164	0.289673	0.00348054	1709.26	55.865	1677.32	25.1653	1639.89	17.42	0.97
ZY2207-14	1507.87	1155.98	1.30441	0.104777	0.00273171	4.2521	0.110531	0.291389	0.00281181	1710.18	48.15	1684.14	21.3995	1648.47	14.0643	0.97
ZY2207-15	761.418	577.338	1.31884	0.106588	0.00272128	4.77939	0.124831	0.322369	0.00416455	1742.59	46.76	1781.29	21.965	1801.29	20.325	0.98
ZY2207-16	588.829	617.827	0.953064	0.106345	0.00296738	4.49459	0.12313	0.303512	0.00353481	1738.88	50.4625	1729.97	22.7845	1708.7	17.5054	0.98
ZY2207-18	1048.1	510.203	2.05427	0.107217	0.00254124	4.78591	0.114147	0.320299	0.00368604	1753.7	43.055	1782.43	20.0686	1791.19	18.0232	0.99
ZY2207-19	33.2421	67.0912	0.495477	0.108604	0.00297176	4.83217	0.132552	0.320319	0.00412622	1776.24	49.6925	1790.51	23.1094	1791.29	20.1694	0.99
ZY2207-20	304.541	322.449	0.944461	0.104887	0.00236533	4.87665	0.109225	0.333108	0.00329529	1722.22	41.825	1798.23	18.9118	1853.43	15.9662	0.96
ZY2207-22	1623.19	1238.31	1.31081	0.104156	0.00205365	4.28833	0.0893649	0.29464	0.00354296	1699.69	36.42	1691.12	17.1969	1664.68	17.6644	0.98
ZY2207-23	637.561	1000.21	0.637429	0.106161	0.00245792	4.55139	0.102053	0.306941	0.0033037	1800	42.2875	1740.42	18.7037	1725.63	16.3219	0.99
ZY2207-24	654.852	385.547	1.6985	0.110128	0.00298084	4.98809	0.130573	0.326753	0.00618333	1811.11	49.0775	1817.31	22.1754	1822.62	30.0596	0.99
ZY2207-26	432.096	653.837	0.660862	0.108571	0.00246032	4.91137	0.122674	0.323349	0.00504184	1775.93	8.3325	1804.21	21.1072	1806.06	24.5796	0.99
ZY2207-27	729.926	1108.81	0.658297	0.10864	0.00260205	4.46041	0.116435	0.29308	0.00429732	1776.86	43.9825	1723.64	21.6832	1656.9	21.4422	0.96
ZY2207-30	3270.11	1134.18	2.88323	0.112708	0.00283176	4.54452	0.115267	0.288447	0.00308777	1843.52	45.215	1739.16	21.1423	1633.76	15.4741	0.93
ZY2207-31	1462.73	3318.73	0.440751	0.112194	0.00284403	4.23976	0.107616	0.270803	0.00283661	1835.5	45.9875	1681.75	20.8857	1544.88	14.4135	0.91
ZY2207-32	1975.73	739.034	2.6734	0.115583	0.00346322	5.16572	0.157783	0.320413	0.00401198	1900	53.705	1846.99	26.0144	1791.74	19.6108	0.96
ZY2207-33	408.73	476.474	0.857822	0.115777	0.00347729	5.19372	0.155992	0.322417	0.00380847	1892.28	54.785	1851.59	25.6039	1801.52	18.5907	0.97
ZY2207-34	2258.68	617.761	3.65623	0.110636	0.00278377	4.56661	0.111105	0.299179	0.00484234	1809.57	44.9125	1743.2	20.3008	1687.24	24.0446	0.96
ZY2207-35	902.188	1246.43	0.72382	0.111071	0.00232892	4.40029	0.0978469	0.284384	0.00304762	1816.97	32.8725	1712.39	18.4344	1613.4	15.321	0.94
ZY2207-36	2357.97	1880.06	1.2542	0.10855	0.00220274	4.12482	0.087779	0.272611	0.00262756	1775.93	37.0375	1659.23	17.4283	1554.04	13.3363	0.93
Sample location	ZY2202 (N 112°26'00",E 33°52'22"), ZY2204 (N 112°26'17",E 33°52'09"), ZY2205 (N 112°24'48",E 33°50'58") and ZY2207 (N 112°24'53",E 33°50'59")
