# Supplementary material for: Petrogenesis and tectonic setting of late Paleoproterozoic diorites in the Trans-North China Orogen
Source: Copernicus journal article supplement (doi:10.5194/se-17-203-2026), 2026-02-04
Supplement: Supplementary file 2 [file TableS2-WangZY2025-ZirconTrace.xlsx]

## Sheet: Table S2
Table S2 Zircon trace element data for the Jiguanshan diorite obtained by the LA-ICP-MS technique
Sample no.	Age	P	Ti	Y	Nb	La	Ce	Pr	Nd	Sm	Eu	Gd	Tb	Dy	Ho	Er	Tm	Yb	Lu	Hf	Ta	Pb	Th	U	Th/U
	（207Pb/206Pb）	(ppm)	(ppm)	(ppm)	(ppm)	(ppm)	(ppm)	(ppm)	(ppm)	(ppm)	(ppm)	(ppm)	(ppm)	(ppm)	(ppm)	(ppm)	(ppm)	(ppm)	(ppm)	(ppm)	(ppm)	(ppm)	(ppm)	(ppm)
Sample ZY2202
ZY2202-2	1861.12	255.453	4.43197	2963.83	6.72447	0.172191	59.888	1.10627	12.4514	14.2896	0.287947	62.1541	19.0678	218.366	79.4218	350.321	75.1801	673.949	126.815	10511.9	2.46229	197.509	744.83	389.257	1.91347
ZY2202-3	1868.83	600.029	4.19477	8696.52	19.7618	0.285526	197.139	3.29079	46.3308	52.7504	0.76065	207.267	60.2351	667.317	233.832	997.034	210.366	1918.08	362.119	10351.3	4.26279	483.927	1888.34	784.432	2.40727
ZY2202-4	1768.52	574.841	5.05477	4523.56	62.8954	0.164018	123.441	0.638075	9.12064	15.6874	0.562792	75.0155	26.8237	328.852	120.825	542.131	117.392	1034.17	185.701	13522.6	16.0127	545.463	2207.88	1354.62	1.62989
ZY2202-5	1872.53	527.863	6.29018	6837.38	14.9605	0.443483	178.134	4.19204	56.0317	52.7687	1.07757	186.947	51.5335	538.766	187.924	797.496	167.97	1551.48	304.87	9676.82	3.4974	340.34	1440.44	525.483	2.74117
ZY2202-8	1884.88	333.034	3.84734	1950.02	26.7995	0.135119	36.8686	0.204473	2.53085	3.38233	0.0843424	24.2912	10.1193	132.626	49.4991	212.387	44.4234	368.081	62.8744	16444.1	13.2076	240.229	483.915	516.971	0.936059
ZY2202-9	1783.34	944.289	6.57378	10006.9	31.1069	0.458184	173.514	2.69572	40.2966	56.655	1.02205	248.338	78.004	837.258	284.765	1136.29	227.427	1899.31	328.386	12785.3	8.78656	832.712	4027.56	1603.92	2.51108
ZY2202-10	1781.17	742.026	5.36187	7691.76	13.0518	0.670492	81.1501	1.06651	14.0143	25.35	1.83477	140.603	50.4532	637.16	236.916	1023.73	203.221	1677.45	278.767	10530.2	7.50153	507.152	2090.88	1218.17	1.71641
ZY2202-11	1794.44	674.156	6.58624	8058.86	18.6739	0.451063	149.487	2.65775	41.6116	50.2845	0.990969	200.25	59.8686	647.589	233.093	1001.27	208.111	1871.03	358.791	9728.04	4.32553	532.151	1953.54	875.906	2.23031
ZY2202-12	1747.83	586.072	10.6808	5502.56	12.8703	0.312168	107.943	2.49554	37.3669	43.1396	0.977041	155.411	43.8722	459.843	161.09	687.028	140.419	1290.96	249.988	8828.47	3.28951	279.831	1032.21	501.795	2.05704
ZY2202-13	1747.83	853.798	6.90449	13222.6	72.4223	0.639695	374.131	6.41697	95.7072	163.326	1.84184	738.392	218.071	1852	441.214	1287.48	198.675	1441.61	227.797	11190.8	18.0928	490.644	2698.02	636.197	4.24086
ZY2202-14	1768.52	422.937	36.2795	3848.8	94.494	24.5268	1117.04	102.891	976.173	555.088	6.50386	593.679	91.8401	524.553	107.663	338.17	63.5244	544.698	99.9815	10221.9	13.806	408.461	2708.47	442.743	6.11746
ZY2202-15	1760.8	448.812	2.78215	3945.8	13.8267	0.583265	56.8258	0.846465	11.8883	18.062	0.443254	81.889	27.6177	309.733	108.393	461.754	95.6215	832.555	146.506	13779.1	5.70829	287.672	877.057	503.745	1.74107
ZY2202-17	1879.63	679.463	6.57815	8667.26	76.0089	1.88018	339.315	10.3228	120.538	146.732	1.35812	511.207	129.549	979.147	228.298	714.503	126.171	991.512	160.941	12441.2	22.0889	616.268	4087.11	800.922	5.10301
ZY2202-18	1651.54	838.942	14.4628	7281.53	18.3953	0.254139	63.7062	0.838993	11.9718	25.1621	0.462985	132.661	46.3813	558.865	212.233	942.478	198.369	1724.43	300.145	11893.6	12.6827	877.623	4083.55	2294.12	1.78
ZY2202-20	1757.71	369.432	6.44591	2216.31	15.9368	0.772409	43.2015	0.362618	4.69291	6.5446	0.204328	35.5798	12.7351	162.092	62.7057	282.937	61.0643	555.521	100.629	13831.8	7.53564	256.245	570.249	559.499	1.01921
ZY2202-21	1642.59	1195.09	9.789	6459.77	96.9005	0.207847	197.222	0.82417	12.3958	21.7487	0.551321	117.982	40.9052	475.605	169.816	717.407	146.804	1248.63	208.372	14926.9	38.0686	1045.66	4372.32	2538.4	1.72247
ZY2202-22	1716.66	768.483	5.91855	5956.26	87.8815	0.110462	187.277	0.647512	9.45157	18.7836	0.635165	106.824	38.629	456.394	161.152	676.204	139.378	1177.09	196.888	13209.5	22.3706	693.508	2099.13	1658.15	1.26595
ZY2202-23	1746.29	551.171	3.61703	3911.6	10.7921	0.118198	47.5596	0.656227	8.61847	14.3842	0.365368	70.632	24.2223	293.877	109.989	478.186	101.431	900.987	163.16	13032.7	3.5881	321.482	775.711	637.473	1.21685
ZY2202-24	1747.21	332.591	2.80471	1732.72	60.15	0.371608	49.0368	0.38728	4.29901	7.68567	0.141431	38.0707	13.4548	147.961	49.0836	199.036	39.8995	332.902	56.8778	13086.9	43.9652	265.504	946.762	479.553	1.97426
ZY2202-25	1772.22	372.754	2.6309	1872.25	17.5705	0.184842	41.3667	0.187732	3.02728	5.58173	0.0872311	29.8856	11.2002	139.377	53.1281	239.171	51.1363	455.69	83.2323	10835.8	7.94369	172.972	481.29	337.015	1.4281
ZY2202-26	1820.37	847.688	4.83554	7017.11	27.9504	0.517992	104.433	1.27626	15.376	25.3914	0.597128	130.171	45.288	524.366	181.473	737.772	149.081	1255.32	209.19	13459.6	15.2621	406.622	1353.09	839.594	1.6116
ZY2202-27	1824.38	1522.38	10.8354	5923.19	93.2535	9.31636	111.398	3.57563	21.0613	19.5982	1.0461	95.0915	35.6927	458.695	167.429	700.439	138.603	1124.87	184.679	14898.5	47.1841	713.389	4395.86	1603.95	2.74064
ZY2202-28	1861.42	642.664	4.98725	4187.42	21.6782	0.411798	48.6262	0.582388	7.19815	11.0107	0.380962	65.04	24.2694	310.331	120.028	549.859	116.862	1023.23	176.713	13116.9	15.2124	556.797	1608.32	1385.98	1.16042
ZY2202-32	1699.08	1114.96	7.38557	18328.6	103.656	1.88128	472.55	6.07905	85.5019	128.533	0.922759	541.481	168.028	1654.08	480.841	1721.68	318.46	2564.99	411.452	13233.6	19.6467	1271.14	8553.54	2095.39	4.08208
ZY2202-34	1745.98	323.055	1.65292	1424.75	22.5934	0.0661156	30.4546	0.115585	2.22558	4.55082	0.134495	26.685	10.3878	123.738	40.5926	162.262	31.2644	266.221	44.9385	12384.1	14.8536	126.434	309.018	261.777	1.18047
ZY2202-35	1768.83	376.526	5.76399	4729.8	11.0199	0.300058	101.222	1.77835	24.3266	27.7945	0.422608	110.502	31.6325	348.212	127.137	566.64	124.968	1213.28	245.209	12267.4	4.25822	223.925	880.873	372.574	2.36429
ZY2202-36	1664.81	705.209	7.36245	3923.38	44.7429	0.604968	115.798	0.831538	10.4304	14.3575	0.797949	68.4069	24.7244	283.177	106.772	484.206	104.638	957.052	176.829	13260.4	15.4373	565.652	2245.32	1116.38	2.01126
ZY2202-38	1735.49	631.615	5.37063	4471.62	43.9092	0.737705	118.284	1.40339	15.0089	19.3037	0.498309	92.7767	33.8178	394.135	136.131	536.039	102.304	827.667	139.451	10052.5	18.2521	369.059	1408.77	678.465	2.07641
ZY2202-40	1769.44	591.931	4.68821	1887.06	21.5446	0.0510384	41.6552	0.15329	2.4234	4.51375	0.0399682	26.9826	10.0537	126.102	49.8501	233.474	52.5462	484.187	89.6477	12538.6	12.5063	355.57	868.247	733.234	1.18413
Sample ZY2204
ZY2204-1	1727.78	614.815	1.29853	2786.93	12.7835	0.0359877	29.2654	0.0701002	1.31921	3.73694	0.126414	26.0268	11.7071	170.724	77.6598	420.842	102.685	1009.35	192.129	10164.8	20.4817	640.651	528.627	1763.07	0.299834
ZY2204-2	1775.93	298.426	3.32033	1363.24	5.5944	0.0436641	25.7628	0.102086	1.64431	3.7835	0.647096	21.8412	8.42497	110.229	43.9227	206.239	44.8247	412.339	77.6367	10978.3	5.93883	242.189	310.116	575.857	0.53853
ZY2204-3	1772.53	809.111	10.5726	10622	16.8405	0.650244	243.926	4.73637	69.3498	78.3598	1.32833	300.919	87.6791	941.479	327.877	1372.1	278.429	2399.25	434.744	9147.42	4.07018	526.949	2123.05	900.97	2.3564
ZY2204-4	1765.73	370.706	7.17183	6905.02	25.3827	0.3681	111.353	3.92727	73.548	123.131	8.57084	375.795	96.8836	862.302	236.158	831.418	146.98	1169.22	188.231	12258.5	18.9675	286.048	967.948	546.287	1.77187
ZY2204-5	1738.88	199.603	4.75705	1864.64	3.33718	0.023553	30.4379	0.20083	3.94197	7.45591	0.138146	33.2035	12.2299	151.046	58.7286	272.565	58.6431	546.073	104.501	11069.3	1.62782	120.308	225.464	270.899	0.832283
ZY2204-6	1723.76	197.981	3.75712	2881.23	2.83801	0.0425507	24.263	0.348997	5.85556	10.1154	0.608377	51.8607	17.9337	216.186	82.0374	370.155	79.2992	712.812	128.977	13322.3	2.10488	237.435	619.172	490.14	1.26326
ZY2204-7	1710.8	376.452	5.82567	4177.47	3.90335	0.0885666	56.1648	1.1474	15.4529	20.9498	0.278461	85.1636	28.4339	326.77	122.78	559.8	120.683	1107.77	211.395	10606.9	2.14864	227.796	573.489	460.727	1.24475
ZY2204-9	1716.66	416.877	5.21378	6069.84	8.68876	0.19754	54.0837	0.892844	13.8039	25.2319	0.543061	133.605	44.044	522.414	194.071	845.518	174.205	1534.13	284.149	12426.6	3.87721	431.38	1182.86	863.182	1.37035
ZY2204-10	1705.56	848.162	15.7353	7040.98	36.8315	0.127063	243.773	0.929533	15.1156	26.9041	0.618956	139.874	47.4479	576.799	214.455	948.25	199.345	1763.3	317.185	11941.1	16.2063	879.628	2730.68	2054.01	1.32944
ZY2204-11	1749.99	351.187	4.717	1746.57	4.25191	0.127902	29.1986	0.322408	4.00172	6.21391	0.476172	28.6428	10.003	124.892	51.2699	252.641	60.2286	589.643	113.669	12664.2	2.37395	274.977	209.365	804.87	0.260123
ZY2204-13	1902.16	387.926	3.29555	3859.24	3.68451	0.0339788	29.6259	0.403523	6.40515	12.4586	0.2893	65.0752	23.2839	290.365	114.575	533.634	117.712	1092.91	209.12	13064.2	2.66691	324.18	610.497	712.426	0.856926
ZY2204-14	1855.56	400.818	2.71267	1628.59	4.82094	0.0647778	22.76	0.192072	2.95189	5.12764	0.378817	27.3173	10.1058	121.123	50.4911	237.062	51.8621	484.217	93.9904	11562.3	2.23725	151.386	234.89	345.526	0.679804
ZY2204-15	1813.27	399.301	5.41641	4611.02	5.92976	0.182662	89.249	0.902998	13.4193	20.6339	0.861311	96.2252	32.7304	368.838	131.152	568.32	118.299	1061.44	193.253	12557.1	4.32298	568.515	2070.36	1023.64	2.02255
ZY2204-16	1794.44	390.567	2.44718	3154.33	5.12202	0.693665	38.138	0.521283	5.87534	8.7856	0.848971	44.9215	17.0897	214.697	91.9699	455.669	103.661	954.201	177.754	11632	3.52634	305.272	427.054	859.343	0.496954
ZY2204-17	1801.54	236.578	5.64277	1486.8	6.03685	0.0204726	34.0486	0.167962	2.52086	4.58402	0.0914842	24.3287	9.4598	116.358	44.9386	211.181	46.0891	435.348	83.9575	11956.5	3.89934	153.265	297.355	335.96	0.885091
ZY2204-18	1758.95	514.615	5.73699	6586.94	13.6918	0.145241	87.4176	0.933	13.5169	27.7467	0.531257	136.55	45.5259	544.634	203.43	893.436	184.597	1631.48	304.419	12208.3	5.94651	568.352	1713.49	1112.48	1.54025
ZY2204-19	1806.48	96.7101	4.11667	2138.18	3.8838	0.0527914	36.023	0.249156	4.01261	7.71236	0.214594	40.0407	14.5252	168.415	65.8281	305.211	65.8757	611.288	116.361	11272.4	1.82772	129.682	275.041	283.94	0.968661
ZY2204-20	1753.7	144.382	8.76176	2897.69	34.3235	12.5422	707.894	63.2415	618.225	347.107	11.0944	346.067	55.9038	364.793	87.8456	311.109	64.2232	610.308	110.908	13746	12.7553	245.874	1375.79	313.676	4.38603
ZY2204-21	1686.73	438.273	8.88901	5699.41	8.98321	1.1004	96.5669	1.88134	20.7981	29.0233	3.12899	121.493	40.4164	460.682	176.495	793.115	166.414	1481.52	279.802	11818.4	3.30566	370.37	1310.8	911.889	1.43745
ZY2204-22	1728.09	461.92	3.92238	1456.38	4.80481	0.0289992	19.0152	0.127062	2.19917	3.69484	0.0680316	22.3732	8.14871	108.355	44.9148	212.38	47.5101	457.361	89.9866	12211	2.62177	143.767	218.534	325.726	0.670914
ZY2204-25	1635.18	490.654	5.09151	4019.42	15.2604	0.232096	95.8798	0.403452	5.99308	12.3968	1.48198	76.3228	28.6718	354.174	135.534	595	121.581	1059.1	187.119	9511.01	11.7834	506.312	1585.17	1285.29	1.23332
ZY2204-26	1847.22	638.596	13.9557	5336.04	18.1778	2.69831	85.5322	1.58353	17.8589	27.3529	1.23944	113.748	36.8258	429.044	157.872	689.188	146.121	1283.72	225.789	13059.9	11.0394	658.669	2239.66	1336.63	1.67561
ZY2204-27	1766.66	395.908	5.33299	3022.12	12.1537	0.094985	94.7142	0.493168	7.99687	11.8988	0.244703	62.8923	20.7705	250.768	96.0604	426.281	91.2869	818.845	158.177	12048.8	5.91779	279.84	664.681	575.598	1.15477
ZY2204-28	1739.19	228.946	2.85607	1588.92	3.66135	0.0562346	21.9253	0.173616	2.93189	4.59705	0.904221	24.3417	9.11626	116.961	48.1196	234.326	53.8581	515.473	103.071	12770.7	2.74496	178.493	238.499	417.484	0.571277
ZY2204-29	1783.34	329.37	6.52634	4081.62	5.40871	0.521073	85.3668	1.52644	20.9583	25.5528	0.517115	103.718	30.2542	333.572	121.96	527.003	112.842	1033.44	204.193	10774.9	2.67205	196.817	647.279	345.901	1.87128
ZY2204-30	1635.18	455.346	9.22471	3951.25	14.5638	0.131506	75.4366	0.677556	8.18743	14.2906	1.49829	74.9158	25.8512	321.525	121.346	546.08	115.457	1017.38	185.095	14046.3	9.03787	576.066	1901.73	1341.86	1.41724
ZY2204-31	1739.81	309.359	3.96277	4537.74	6.33037	0.116801	52.652	0.921164	15.684	25.1493	0.138013	108.462	34.7033	394.254	141.548	601.184	124.153	1075.3	198.479	13107.3	2.70116	263.224	715.201	511.166	1.39916
ZY2204-32	1677.78	346.247	6.94038	2608.28	14.9223	0.457332	63.3346	0.763241	8.52695	8.52622	2.52585	40.715	13.8135	179.414	74.1615	349.232	81.5367	758.643	140.472	13757.9	15.429	680.409	2240.39	1477.16	1.51669
ZY2204-33	1716.66	309.712	3.40042	6334.92	12.9692	0.144878	93.9724	1.11086	20.2051	36.4985	3.76152	185.036	58.2526	645.109	215.858	820.365	155.853	1265.61	218.527	11252.3	10.7869	280.984	1051.05	501.576	2.0955
ZY2204-34	1713.27	374.962	3.26536	3137.11	4.51444	0.0590694	24.9799	0.225161	4.0321	8.82972	0.910849	47.549	18.4205	238.185	96.3763	456.366	101.896	928.721	177.038	14961	3.71401	375.688	768.445	822.99	0.933724
ZY2204-35	1673.14	247.736	5.52294	3316.63	30.935	0.966368	114.428	0.944798	10.2632	18.0694	3.8021	89.1913	29.0026	303.332	97.7325	385.618	77.1364	663.405	119.87	12361.8	32.6713	538.825	2198.37	1187.04	1.85198
ZY2204-36	1777.47	134.116	4.89809	2876.99	2.8964	0.396141	43.3637	1.93463	29.2913	47.6735	6.55397	162.047	41.5239	369.961	103.37	371.028	69.0977	589.222	103.644	12991.6	3.09539	218.91	758.105	399.966	1.89542
Sample ZY2205
ZY2205-2	1779.94	896.215	6.69986	8204.78	11.8579	0.181504	78.3756	1.16358	20.4552	41.6418	0.834615	200.774	65.1116	746.192	263.802	1115.43	220.464	1873.27	315.435	11877.5	4.8773	555.723	1643.23	1226.64	1.33962
ZY2205-4	1772.22	248.975	3.47032	1403.99	3.38348	0.0167827	24.7922	0.125635	2.30253	3.34953	0.0569195	18.9265	6.89653	93.626	39.0794	204.882	48.4777	495.011	97.4038	12097.9	2.54644	228.288	333.838	523.443	0.637773
ZY2205-5	1739.81	414.086	3.92239	4094.85	4.21094	0.11064	37.1439	0.645059	10.0622	16.923	0.872121	77.2589	25.7265	312.398	116.131	535.956	113.874	1030.7	178.277	12249.2	3.99217	455.202	1332.43	1050.14	1.26881
ZY2205-6	1710.18	480.035	5.678	4607.91	0.986508	0.135382	46.0365	0.83485	12.8797	21.9267	1.33122	95.1216	31.2697	369.406	142.554	655.69	137.796	1243.41	214.433	9963.62	1.37525	809.626	4219.64	1509.43	2.79551
ZY2205-7	1692.28	730.629	10.2977	4651.84	24.7934	0.0993646	157.943	0.765433	13.0908	19.891	0.565215	97.3567	31.8688	377.474	135.209	598.314	125.829	1139.3	202.191	9757.11	10.7362	448.225	1291.1	1196.3	1.07924
ZY2205-10	1638.88	243.974	2.89818	2492.51	1.14136	0.10386	26.0229	0.372326	5.99907	9.85457	0.602805	48.1766	16.3544	203.278	80.8707	391.434	86.1375	820.902	151.895	9002.09	0.86805	466.811	1559.4	1069.55	1.458
ZY2205-11	1723.76	187.755	4.41331	1976.95	4.85726	0.0868421	28.811	0.287338	3.9213	5.82953	2.70948	32.567	11.6809	148.594	57.5016	267.127	58.5283	536.6	93.991	12924	4.56577	268.88	470.886	603.83	0.779832
ZY2205-13	1783.34	354.772	5.56671	4439.9	5.21277	0.120742	61.4527	1.14698	16.4366	26.3851	0.66412	112.281	35.2516	388.052	136.513	583.992	115.85	1018.06	179.284	10802.6	2.35928	266.393	667.488	524.059	1.27369
ZY2205-15	1716.36	639.104	1.65784	7031.75	2.35194	0.120629	71.8128	0.847645	14.251	25.4165	1.91701	133.817	46.2361	564.91	212.501	967.094	196.103	1726.91	293.55	11455.1	1.74159	641.698	3073.89	1259.95	2.4397
ZY2205-16	1768.52	567.376	4.27768	7061.77	11.4648	0.116164	96.9414	1.38284	21.3407	37.2347	0.411116	175.728	57.0604	632.933	208.381	845.486	157.886	1314.51	211.611	11062.8	4.32142	380.165	1203.37	695.992	1.72901
ZY2205-17	1788.89	288.24	2.69364	961.293	2.6082	0.0276055	18.0485	0.0643419	1.20356	2.47397	0.198208	14.6032	5.47921	69.2549	28.4116	141.656	32.2016	309.643	58.6143	11040.2	2.15247	131.288	189.835	300.962	0.630759
ZY2205-18	1812.65	357.603	3.44285	4652.4	5.79205	0.115382	66.0197	1.03655	13.4617	21.4975	0.528791	97.0188	32.9131	374.177	135.332	588.905	119.879	1058.24	184.215	10550.4	3.27817	369.857	954.654	743.752	1.28357
ZY2205-19	1783.34	272.032	3.09842	2605.48	2.43937	0.0378386	29.5819	0.391713	6.72454	10.3244	0.266679	45.4939	16.3233	197.921	76.0675	357.972	77.6305	724.084	132.705	10420.2	1.32146	186.109	411.655	393.667	1.04569
ZY2205-20	1722.22	814.731	5.76454	5502.08	35.1974	0.233172	110.066	0.628888	8.87785	15.6428	3.69784	87.9106	32.122	408.162	161.078	738.351	152.108	1290.59	208.583	10178.8	21.4147	653.938	1743.33	1663.17	1.0482
ZY2205-22	1747.83	505.615	3.0928	4444.01	1.95103	0.117968	51.5703	0.67264	10.0564	15.6005	1.37938	81.1746	28.2336	348.116	137.14	634.668	130.227	1142.81	195.396	12338.1	2.2188	463.027	1930.97	988.267	1.9539
ZY2205-23	1933.34	401.683	2.66431	3576.67	3.70167	0.23185	37.8689	0.697866	9.67604	14.7628	0.327262	72.07	23.9041	286.128	106.237	491.393	103.19	924.276	163.818	11326.2	2.74784	384.682	817.95	743.893	1.09955
ZY2205-25	1786.73	529.885	5.08369	7100.44	5.85602	0.248696	84.5634	1.53758	24.8416	41.5426	1.52717	177.402	53.0202	598.63	211.071	913.272	182.824	1617.4	288.084	12933.6	2.34712	463.962	1180.47	911.35	1.2953
ZY2205-26	1768.52	414.134	2.86772	2119.45	4.04191	0.181668	26.3594	0.331524	4.26058	6.0529	1.94265	30.8575	11.5303	149.096	60.4079	294.584	66.1528	623.409	115.826	11479.2	4.81165	374.519	824.724	944.948	0.872772
ZY2205-27	1800	414.36	5.6112	1960.54	4.20697	0.14117	56.6386	0.265919	4.37066	7.32533	0.955395	38.4196	12.6589	159.338	62.1049	294.638	64.0793	604.27	111.504	8852.87	5.34379	577.595	3817.67	891.767	4.28102
ZY2205-28	1775.93	251.873	4.21002	2496.59	0.684432	0.0854404	25.0921	0.93582	15.3081	22.7049	1.78566	87.7418	25.4791	266.31	83.6861	322.112	62.2299	517.844	82.1914	7292.88	0.35909	205.674	603.128	388.723	1.55156
ZY2205-29	1794.75	221.493	2.90648	3598.67	0.986516	0.351031	38.9241	0.750349	12.2242	19.5941	1.38827	88.7897	27.8732	323.97	115.487	486.58	97.0079	816.824	134	9627.25	0.833024	312.721	1431.07	477.273	2.99843
ZY2205-30	1753.7	404.555	6.35634	2278.71	4.37779	0.459035	36.4317	0.427754	5.53018	8.13836	0.857546	37.6386	13.147	163.664	66.3516	328.175	74.2139	711.62	138.738	13932.9	3.42983	266.722	519.449	611.041	0.850105
ZY2205-31	1731.48	446.168	2.82116	5946.16	3.83871	0.0832173	60.4255	0.773887	13.7174	24.2711	1.29326	125.689	41.8651	497.634	183.101	776.045	157.395	1325.06	224.824	10955	4.83394	480.4	2152.46	746.958	2.88163
ZY2205-32	1768.83	318.366	2.76914	1954.09	3.73702	0.0240045	28.2218	0.219913	3.19291	6.31946	0.175253	31.0343	11.7047	142.943	55.9004	250.989	53.8518	484.915	85.2536	11588.9	2.45026	161.129	266.642	349.013	0.763989
ZY2205-33	1832.41	413.878	5.34375	4122.43	4.12251	0.0866368	35.6871	0.703772	11.1393	16.7974	0.402528	89.5943	28.8372	338.986	126.343	555.345	116.793	1046.02	192.084	13398.3	2.21862	298.227	575.277	621.582	0.925504
ZY2205-35	1775.93	452.275	2.52505	4973.44	8.77974	0.0505841	51.5194	0.472563	8.04163	16.2483	0.165523	89.8496	34.4073	400.166	132.306	526.119	101.77	818.561	128.246	13436.6	6.69402	338.383	671.576	755.188	0.889284
ZY2205-36	1742.9	770.664	4.96285	9987.92	12.8631	0.283391	143.379	2.1604	32.8574	52.5514	1.22971	233.825	74.3345	831.492	296.774	1280.04	261.237	2276.77	414.353	12112.8	3.99187	589.093	1940.74	1206.03	1.60919
Sample ZY2207
ZY2207-1	1761.11	440.448	8.44273	2565.14	16.019	0.942831	60.1602	0.390905	5.72157	10.7756	0.34248	50.1942	17.0144	192.138	72.5781	327.994	69.8816	639.518	114.272	11133.6	9.22893	430.377	1246.49	983.245	1.26773
ZY2207-2	1769.44	441.555	36.5915	5459.21	20.022	0.42222	74.323	0.829637	12.6288	22.1376	0.234447	110.631	37.3081	446.721	168.502	728.927	152.762	1347.09	233.858	11302.8	6.8118	442.704	1063.6	1020.47	1.04226
ZY2207-3	1795.37	421.575	7.53178	3782.27	17.6089	0.131718	81.5852	0.727461	11.5746	17.2897	0.392077	81.2377	26.3601	304.899	113.106	508.536	108.747	994.521	184.983	11771.4	7.93354	333.056	813.338	683.893	1.18928
ZY2207-4	1799.69	141.24	3.69886	860.977	3.85872	0.0132623	15.3132	0.0506571	1.06447	2.47122	0.0491209	12.3833	4.81092	61.2003	24.798	119.371	27.8254	270.72	48.9752	9772.36	2.56459	80.3674	113.161	180.672	0.626334
ZY2207-5	1766.66	373.34	4.30087	2990.37	16.8214	0.0485546	51.4566	0.350843	5.36221	9.84081	0.0972564	49.3981	18.5362	228.71	87.6128	404.051	89.5675	824.807	147.96	11865.1	6.95593	312.725	487.754	690.683	0.706191
ZY2207-6	1788.89	204.255	6.15011	2355.14	3.50215	0.0463115	32.9422	0.661562	10.9993	14.7408	0.348817	60.1973	18.045	198.12	73.3736	319.997	68.2322	633.04	121.387	11119.8	1.72196	115.621	261.423	225.025	1.16175
ZY2207-7	1749.99	265.267	3.25096	967.454	10.5739	0.0118877	13.039	0.0420355	0.488579	1.27733	0.00890353	10.0947	4.47891	61.8189	26.8684	133.202	30.9102	290.176	52.0277	15615.9	8.46048	128.155	109.553	305.164	0.358996
ZY2207-8	1762.04	277.019	2.68168	3102.17	0.984569	0.0558092	23.6036	0.408728	6.54319	12.666	0.467421	60.6389	20.5059	248.21	94.9192	429.088	92.0848	825.306	144.244	9899.51	0.992616	313.655	956.785	602.635	1.58767
ZY2207-9	1783.34	473.582	2.22053	5564.17	8.85871	0.0496163	35.8812	0.450181	7.13161	15.0483	0.702986	100.152	36.0569	440.862	164.751	720.221	151.99	1365.67	248.765	12502	10.865	415.411	1202.92	762.056	1.57852
ZY2207-10	1768.52	436.966	7.64125	3768.33	7.74516	0.0473714	35.844	0.507239	7.05018	14.6135	0.178081	78.1892	26.4008	311.826	115.457	513.936	106.167	939.106	165.121	11794.8	3.92645	300.687	598.827	631.285	0.948584
ZY2207-12	1700	781.209	5.59617	7194.86	20.5643	0.129287	64.4305	0.901581	15.1102	27.9155	0.604491	139.764	48.7319	579.458	215.16	950.266	197.887	1742.99	301.537	10788.3	6.20756	556.617	1500.01	1247.79	1.20214
ZY2207-13	1709.26	371.482	3.91282	5051.17	2.1915	0.0955732	42.6444	0.780693	12.1052	25.2829	1.40858	120.679	39.4122	445.708	157.062	654.166	130.404	1128.21	191.817	10762.5	2.03433	547.167	2112.68	1080	1.95618
ZY2207-14	1710.18	670.922	5.71847	6838.88	27.0057	0.268987	103.659	0.874074	14.4304	27.9823	0.634861	138.615	47.5521	550.465	199.134	870.809	179.148	1570.86	271.037	12317.2	8.52435	521.64	1507.87	1155.98	1.30441
ZY2207-15	1742.59	314.039	2.9086	1878.88	3.11338	0.0316813	36.6515	0.139592	2.6145	5.61704	0.314219	32.7063	11.9424	148.143	57.9292	258.863	56.1186	513.974	91.3471	10833.8	3.4809	285.633	761.418	577.338	1.31884
ZY2207-16	1738.88	487.052	7.08325	5466.15	10.0782	0.0976618	55.4604	0.945199	15.6171	25.6345	0.365074	115.837	38.6075	455.593	169.046	747.16	156.303	1415.65	258	8063.87	2.81379	279.446	588.829	617.827	0.953064
ZY2207-18	1753.7	369.054	3.08584	4682.48	2.29624	0.0619948	36.4082	0.511416	8.34393	16.8419	0.786063	93.245	31.517	377.378	142.478	613.305	126.955	1100.28	186.883	10132.4	1.80493	289.681	1048.1	510.203	2.05427
ZY2207-19	1776.24	200.369	3.10787	370.624	2.6631	0.0117492	11.5213	0.0105034	0.573953	1.07827	0	5.02485	2.06957	27.2903	11.2421	54.7655	12.4361	127.687	25.9982	11012.7	1.72664	28.3426	33.2421	67.0912	0.495477
ZY2207-20	1722.22	215.289	6.13925	2046.76	3.8683	0.0316597	27.9979	0.443654	7.12545	11.1537	0.126087	47.7546	15.4106	175.885	63.5239	286.626	60.9184	553.147	103.892	10701.3	3.08146	155.349	304.541	322.449	0.944461
ZY2207-22	1699.69	617.18	3.65441	6360.89	14.8962	0.0982422	48.6961	0.697733	9.21805	21.3093	0.363041	119.826	42.0239	511.811	184.519	821.656	168.285	1447.32	242.893	13842.9	8.43675	538.949	1623.19	1238.31	1.31081
ZY2207-23	1800	359.387	6.74062	2770.92	6.43137	2.70626	39.6183	1.04781	10.7331	15.0556	0.526553	65.3404	20.8666	238.171	86.4667	390.661	82.3384	753.976	141.443	12581.1	3.13457	410.284	637.561	1000.21	0.637429
ZY2207-24	1811.11	320.885	5.59969	4112.11	5.21321	0.547361	43.3906	0.616557	10.2336	18.1712	0.546391	89.4149	30.8223	357.962	128.817	544.883	106.725	881.757	144.427	10738.5	6.26936	209.042	654.852	385.547	1.6985
ZY2207-26	1775.93	278.097	4.18262	2261.23	9.65604	0.848605	26.5602	0.247589	3.35558	5.94585	0.0519672	32.9858	12.2826	158.536	64.092	307.783	66.7902	615.7	111.323	13834.8	6.66256	270.181	432.096	653.837	0.660862
ZY2207-27	1776.86	345.791	5.65888	4325.73	21.0665	1.25502	61.2433	0.58161	7.87337	13.825	0.341671	67.8611	25.6747	318.318	122.889	574.665	125.076	1120.74	196.647	13926.9	8.27942	425.577	729.926	1108.81	0.658297
ZY2207-30	1843.52	801.16	4.99069	8474.99	6.39012	0.168988	77.5576	1.03649	16.2251	33.5227	1.58896	185.732	61.8209	728.276	263.327	1146.99	226.933	1950.34	332.17	9951.16	4.30271	676.021	3270.11	1134.18	2.88323
ZY2207-31	1835.5	1084.3	5.21981	9193.96	22.045	0.114503	74.1738	0.722412	9.88728	22.1306	0.327271	124.21	48.6215	640.555	262.755	1294.62	283.318	2529.79	436.919	10136.1	10.7665	1192.85	1462.73	3318.73	0.440751
ZY2207-32	1900	614.097	6.73052	3509.8	6.49406	0.0337248	95.9837	0.408025	6.61151	14.3563	0.523985	83.859	26.817	306.683	108.314	450.508	87.1117	719.851	114.147	10330.9	5.00353	474.756	1975.73	739.034	2.6734
ZY2207-33	1892.28	361.235	7.24506	3504.91	4.56188	0.0895489	40.1436	0.844431	12.4582	18.6583	0.300149	76.4708	25.7652	299.914	108.958	490.346	103.303	919.743	171.104	8862.35	2.17034	223.626	408.73	476.474	0.857822
ZY2207-34	1809.57	539.485	1.90526	5837.43	3.72799	0.0646832	80.0317	0.814613	15.7347	27.4283	1.16668	135.152	44.5449	511.839	182.555	775.241	152.298	1291.38	212.065	11484.8	3.57649	424.36	2258.68	617.761	3.65623
ZY2207-35	1816.97	312.131	5.32684	2996.09	6.34	0.594041	52.5287	0.811113	9.79561	14.8094	0.49925	61.3151	20.0005	238.506	88.3439	410.784	88.553	806.189	144.726	11805	3.97192	491.023	902.188	1246.43	0.72382
ZY2207-36	1775.93	709.887	4.3303	7442.69	4.59204	0.567407	122.246	1.3023	19.7596	33.5349	1.70233	156.946	50.8388	606.819	225.725	1043.03	220.195	1950.98	340.605	9178.13	2.90451	787.637	2357.97	1880.06	1.2542
