# Supplementary material for: Petrogenesis and tectonic setting of late Paleoproterozoic diorites in the Trans-North China Orogen
Source: Copernicus journal article supplement (doi:10.5194/se-17-203-2026), 2026-02-04
Supplement: Supplementary file [file se-17-203-2026-supplement-title-page.pdf › se-17-203-2026-supplement-title-page.pdf]

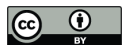

*Supplement of*

## **Petrogenesis and tectonic setting of late Paleoproterozoic diorites in the Trans-North China Orogen**

**Zhiyi Wang et al.**

*Correspondence to:* Jun He ([jhe1989@ustc.edu.cn](mailto:jhe1989@ustc.edu.cn))

- [se-17-203-2026-supplement-title-page.pdf](#)
- [TableS1-WangZY2025-ZirconAge.xlsx](#)
- [TableS2-WangZY2025-ZirconTrace.xlsx](#)

The copyright of individual parts of the supplement might differ from the article licence.
